# Supplementary material for: Evolution, geographic spreading, and demographic distribution of Enterovirus D68
Source: PubMed Central journal article supplement (PMC9212145; doi:10.1371/journal.ppat.1010515), 2022-05-31

Epitope At C Terminus ^

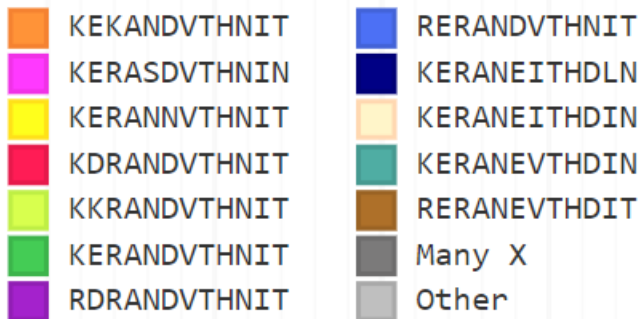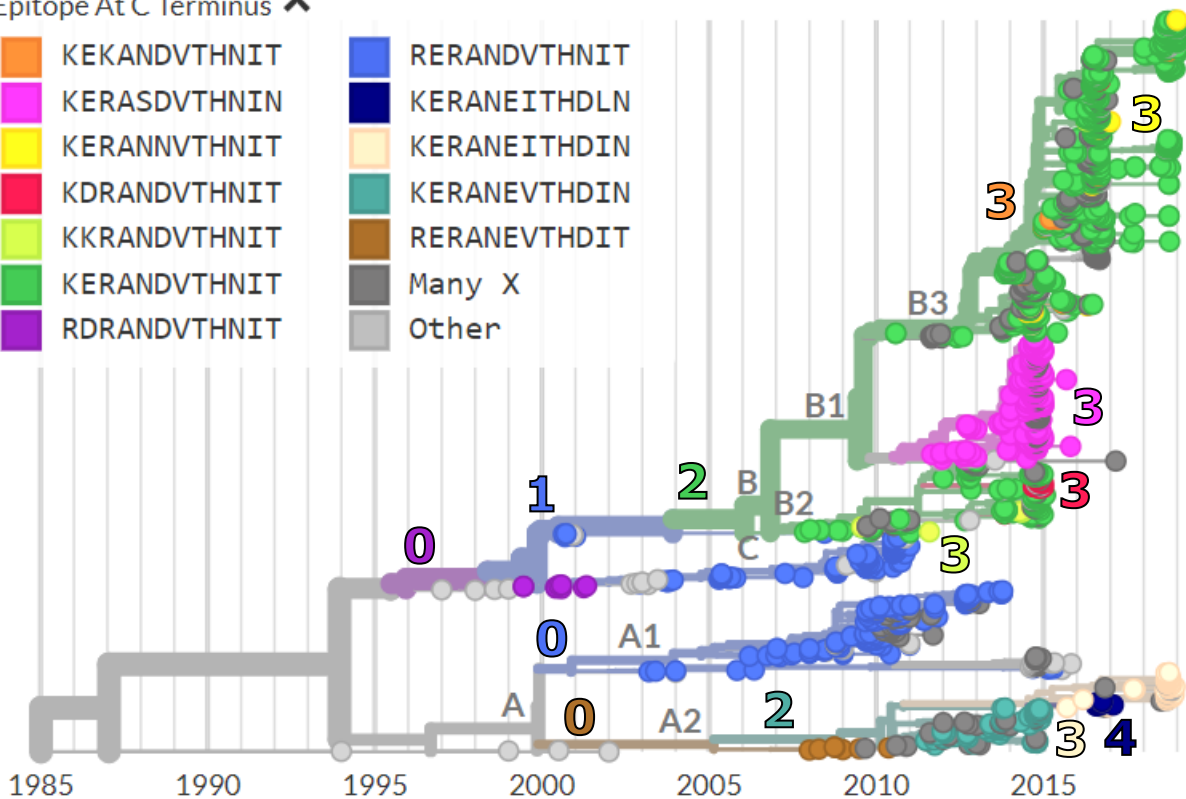

Supplement: ppat.1010515.s007.pdf [file ppat.1010515.s007.pdf]
