# Supplementary material for: Evolution, geographic spreading, and demographic distribution of Enterovirus D68
Source: PubMed Central journal article supplement (PMC9212145; doi:10.1371/journal.ppat.1010515), 2022-05-31

**Europe**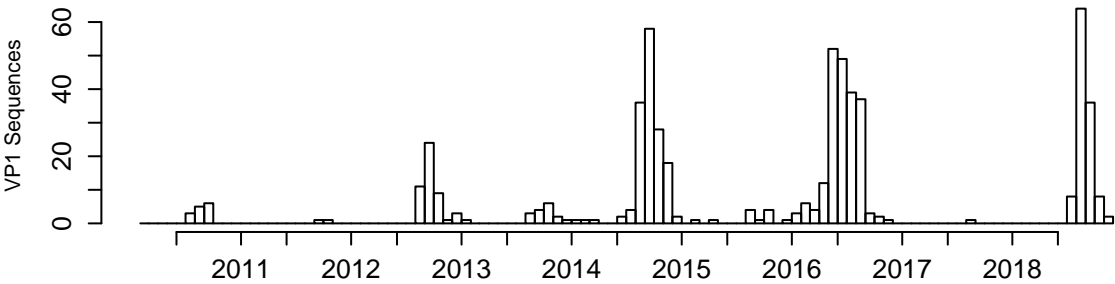**China**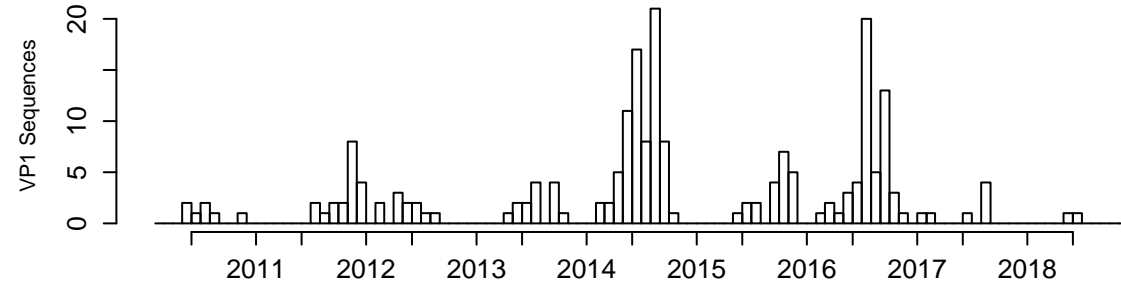**North America**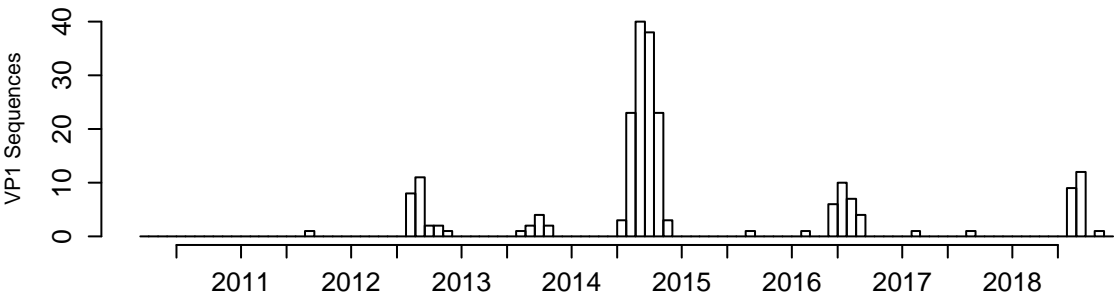**Southeast Asia**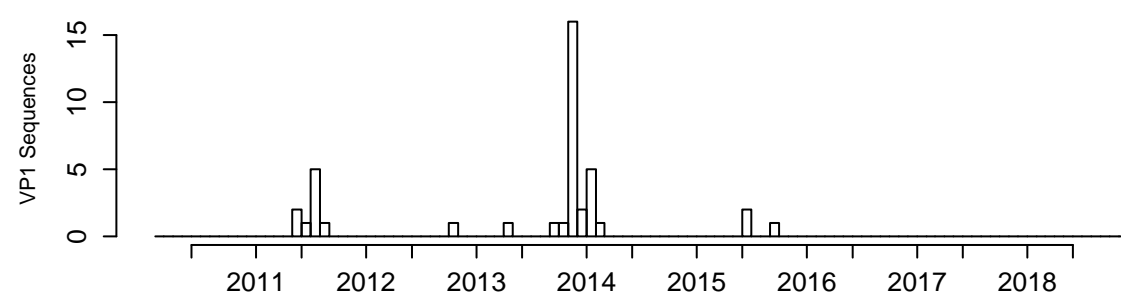**Africa**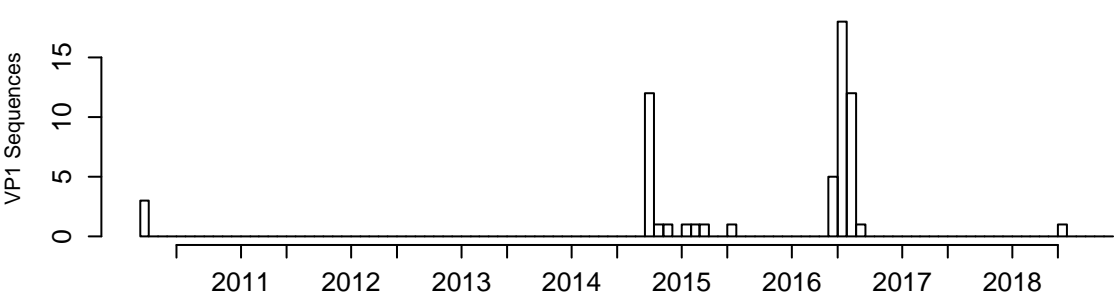**Japan Korea**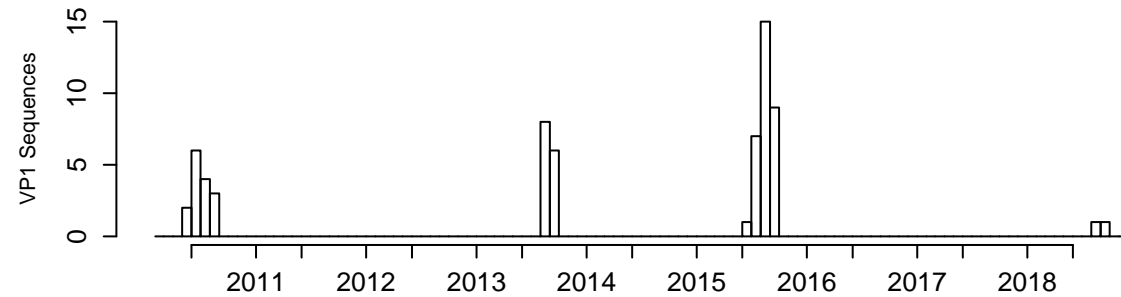**Oceania**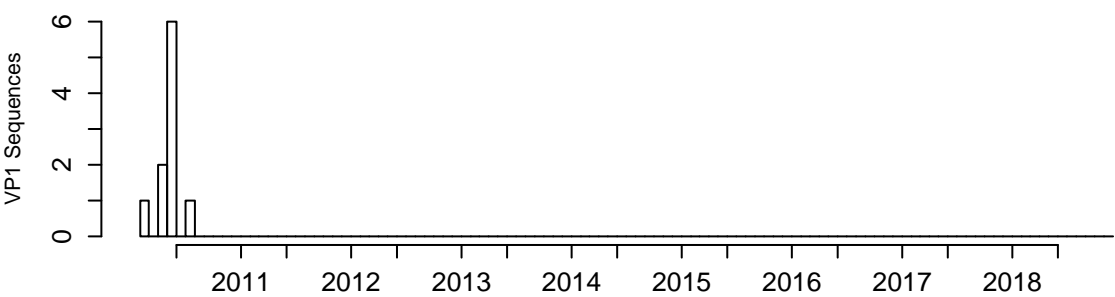**South Asia**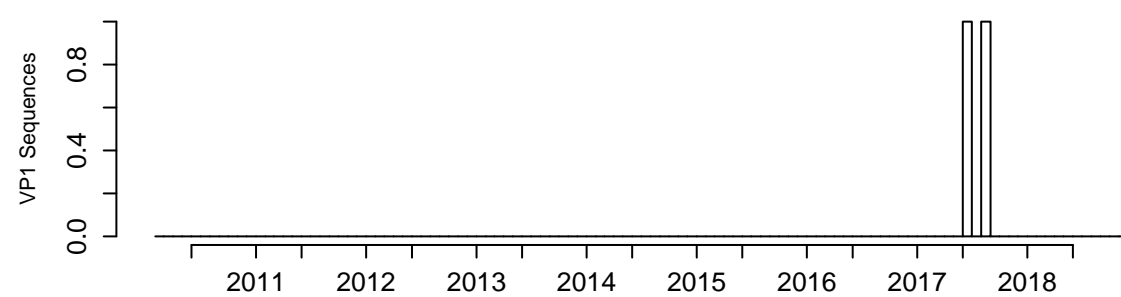

Supplement: ppat.1010515.s008.pdf [file ppat.1010515.s008.pdf]
